# Supplementary material for: A chiral supramolecular liquid crystal based on pillararene and its application in information encryption
Source: Royal Society of Chemistry journal article supplement (doi:10.1039/d4cc02698e), 2024-01-01
Supplement: d4cc02698e1.pdf [file d4cc02698e1.pdf]

# Chiral Supramolecular liquid crystal based on pillararene and its application in information encryption

Bicong Liang,<sup>a</sup> Yujie Cheng,<sup>b</sup> Jiabin Ma,<sup>b</sup> Lan Jia,<sup>a</sup> Qiang Zheng,<sup>a</sup> Pi Wang<sup>\*a</sup> and Danyu Xia<sup>\*b</sup>

<sup>a</sup>College of Materials Science and Engineering, Taiyuan University of Technology, Taiyuan, 030024, P. R. China. E-mail: wangpi@tyut.edu.cn.

<sup>b</sup>Scientific Instrument Center, Shanxi University, Taiyuan 030006, P. R. China. Email: danyuxia@sxu.edu.cn.

## Electronic Supplementary Information (10 pages)

|     |                                                                                                               |     |
|-----|---------------------------------------------------------------------------------------------------------------|-----|
| 1.  | Materials and methods                                                                                         | S2  |
| 2.  | Host–guest complexation study of <b>P5-Chol</b> and <b>TPE-CN</b>                                             | S3  |
| 3.  | <sup>1</sup> H NMR spectroscopy of <b>P5-Chol</b> and <b>TPE-CN</b> at different concentrations               | S4  |
| 4.  | Partial X-ray diffraction patterns of <b>P5-Chol</b> and <b>P5-Chol</b> ⊃ <b>TPE-CN</b> at room temperature   | S5  |
| 5.  | Calculated structures of <b>P5-Chol</b> and <b>TPE-CN</b>                                                     | S5  |
| 6.  | SEM images of <b>P5-Chol</b> and <b>P5-Chol</b> ⊃ <b>TPE-CN</b>                                               | S6  |
| 7.  | Circular dichroism (CD) spectra of <b>P5-Chol</b> and <b>P5-Chol</b> ⊃ <b>TPE-CN</b>                          | S6  |
| 8.  | <sup>1</sup> H NMR spectroscopy experiments of the pH-responsiveness of <b>P5-Chol</b> ⊃ <b>TPE-CN</b>        | S7  |
| 9.  | POM images of <b>P5-Chol</b> during the decrease of temperature at the concentration of 10 mM                 | S7  |
| 10. | POM images of <b>P5-Chol</b> during the decrease of temperature at the concentration of 70 mM                 | S8  |
| 11. | POM images of <b>P5-Chol</b> ⊃ <b>TPE-CN</b> during the decrease of temperature at the concentration of 10 mM | S8  |
| 12. | POM images of <b>P5-Chol</b> ⊃ <b>TPE-CN</b> during the decrease of temperature at the concentration of 70 mM | S8  |
| 13. | Absorption and emission spectra of <b>P5-Chol</b> and <b>TPE-CN</b>                                           | S9  |
| 14. | Solid fluorescence emission spectra of <b>P5-Chol</b> ⊃ <b>TPE-CN</b>                                         | S9  |
|     | References                                                                                                    | S10 |

## ***1. Materials and methods***

All chemicals were obtained from commercial suppliers and were used as supplied without further purification. All reactions were conducted with oven-dried glassware under atmosphere or nitrogen. Solvents were dried and distilled following usual protocols. Column chromatography was carried out using silica gel (200-300 mesh). Compounds **P5-Chol**<sup>S1</sup> and **TPE-CN**<sup>S2</sup> was prepared according to published procedures. The NMR spectra were recorded with a Bruker Avance DMX 600 spectrophotometer. High-resolution mass spectrometry experiments were performed with a Thermo Scientific Q Exactive instrument. The melting points were collected on a SGW X-4 automatic melting point apparatus. Scanning Electron Microscopy (SEM) investigations were carried out on a PerkinElmer Gemini SEM300 instrument. Fluorescent microscopy investigations were carried out on a HITACHI F-7100 fluorescence spectrometer. Phase behavior was studied by NP900 Polarizing Optical Microscopy (POM) equipped with a hot-stage from -40.0 to 500 °C. Room-temperature X-ray Diffraction (XRD) experiments were performed on a Bruker D2 PHASER X-ray diffractometer using Cu K<sub>α1</sub> radiation. Circular dichroism (CD) spectra were performed on a Bio-Logic MOS-500 instrument.

## 2. Host–guest complexation study of **P5-Chol** and **TPE-CN**

As shown in Fig. S1, compared to **P5-Chol** and **TPE-CN** alone (Fig. S1a and c), the peaks related to the protons  $H_4$ – $H_6$  of the alkyl chain group on **TPE-CN** shifted upfield, and the peaks related to the protons  $H_f$ – $H_h$  and  $H_o$ – $H_q$  on **P5-Chol** shifted downfield, indicating that the alkyl chain part of **TPE-CN** are located within the cavity of **P5-Chol** upon the formation of the host–guest inclusion complex **P5-Chol**⊃**TPE-CN**.

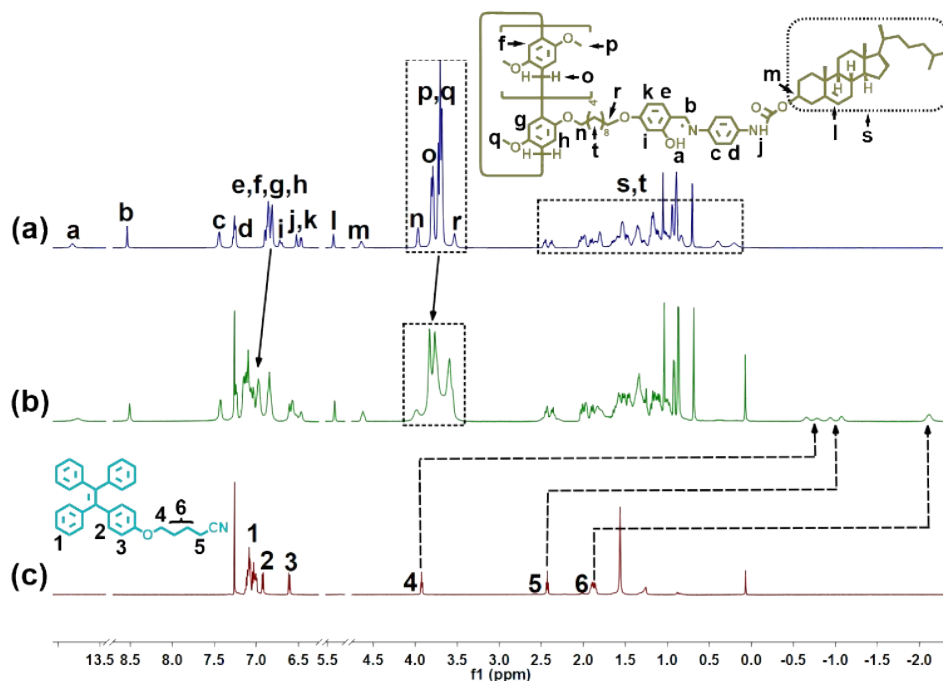

**Figure S1.** Partial  $^1\text{H}$  NMR spectra (600 MHz,  $\text{CDCl}_3$ , 298 K): (a) **P5-Chol** (5.00 mM); (b) **P5-Chol** (5.00 mM) and **TPE-CN** (5.00 mM); (c) **TPE-CN** (5.00 mM).

### 3. $^1\text{H}$ NMR spectroscopy of *P5-Chol* and *TPE-CN* at different concentrations

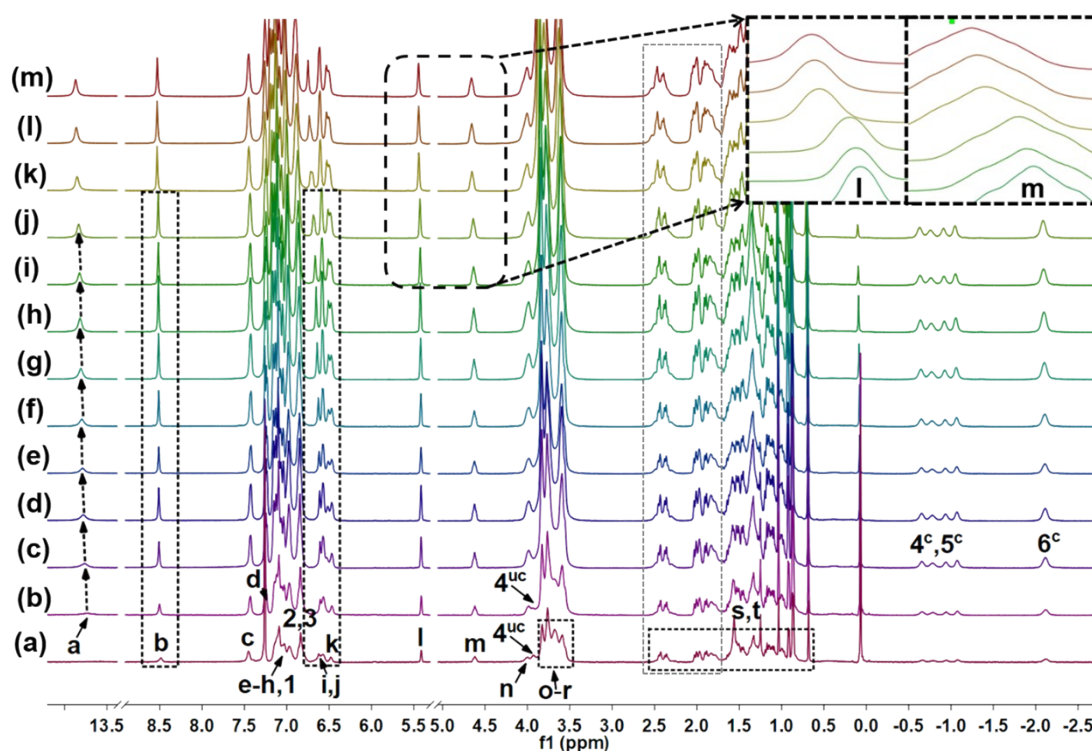

**Figure S2.** Partial  $^1\text{H}$  NMR spectra (600 MHz,  $\text{CDCl}_3$ , 298 K) of equimolar mixtures of **P5-Chol** and **TPE-CN** at different concentrations: (a) 2.50 mM; (b) 5.00 mM; (c) 10.0 mM; (d) 14.28 mM; (e) 20.0 mM; (f) 25.0 mM; (g) 33.3 mM; (h) 40.0 mM; (i) 50.0 mM; (j) 62.5 mM; (k) 70.0 mM; (l) 83.3 mM; (m) 100 mM.

#### 4. Partial X-ray diffraction patterns of P5-Chol and P5-Chol $\supset$ TPE-CN at room temperature

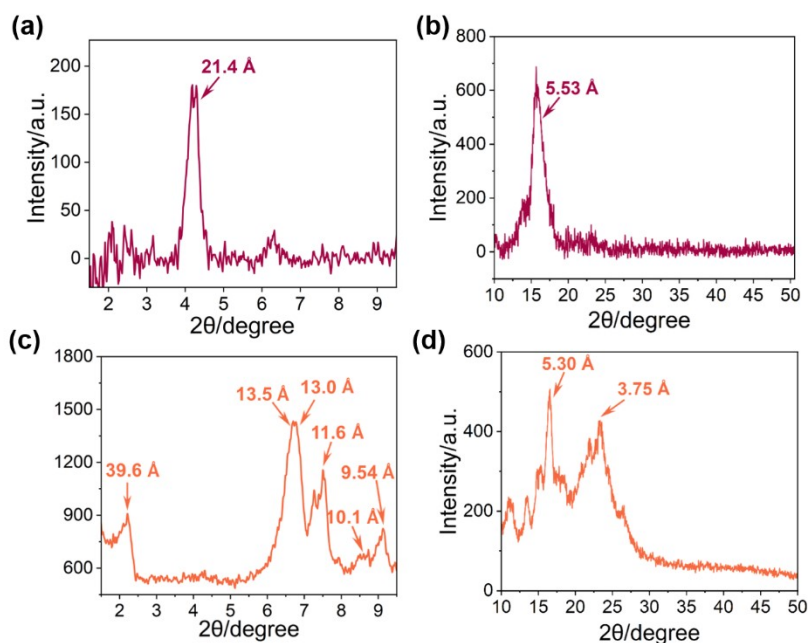

**Figure S3.** (a) Partial XRD pattern of **P5-Chol** at room temperature in the small-angle range; (b) Partial XRD pattern of **P5-Chol** at room temperature in the wide-angle range; (c) Partial XRD pattern of **P5-Chol $\supset$ TPE-CN** at room temperature in the small-angle range; (d) Partial XRD pattern of **P5-Chol $\supset$ TPE-CN** at room temperature in the wide-angle range.

#### 5. Calculated structures of P5-Chol and TPE-CN

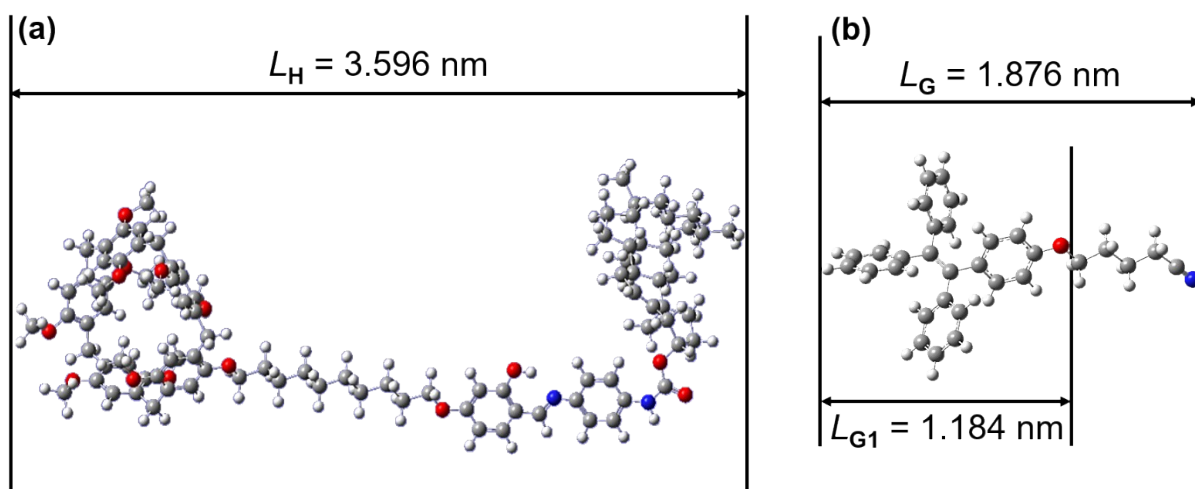

**Figure S4.** Calculated structures: (a) **P5-Chol**; (b) **TPE-CN**.

## 6. SEM images of **P5-Chol** and **P5-Chol**⊃**TPE-CN**

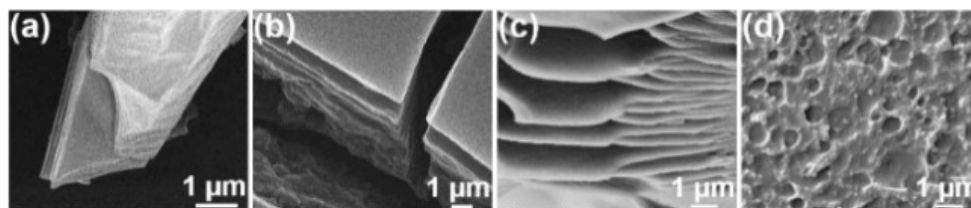

**Figure S5.** SEM images of gold-coated samples: (a) **P5-Chol** (70.0 mM) (lamellar phase); (b) **P5-Chol** (70.0 mM) and **TPE-CN** (70.0 mM) (lamellar phase); (c) **P5-Chol** (70.0 mM) and **TPE-CN** (70.0 mM) (intermediate state); (d) **P5-Chol** (70.0 mM) and **TPE-CN** (70.0 mM) (bicontinuous cubic phase).

## 7. Circular dichroism (CD) spectra experiments of **P5-Chol** and **P5-Chol**⊃**TPE-CN**

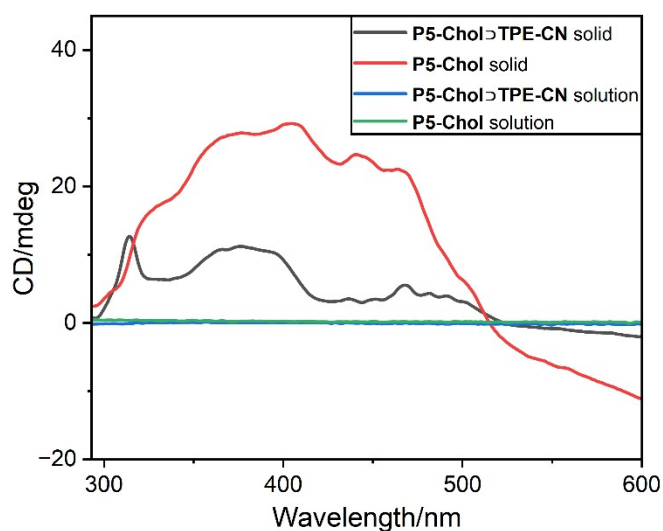

**Figure S6.** CD spectra of **P5-Chol**⊃**TPE-CN** in the solid state (black line), **P5-Chol** in the solid state (red line), **P5-Chol**⊃**TPE-CN** in solution ( $10^{-2}$  mM, blue line) and **P5-Chol** in solution ( $10^{-2}$  mM, green line).

## 8. $^1\text{H}$ NMR spectroscopy experiments of the pH-responsiveness of P5-Chol-TPE-CN

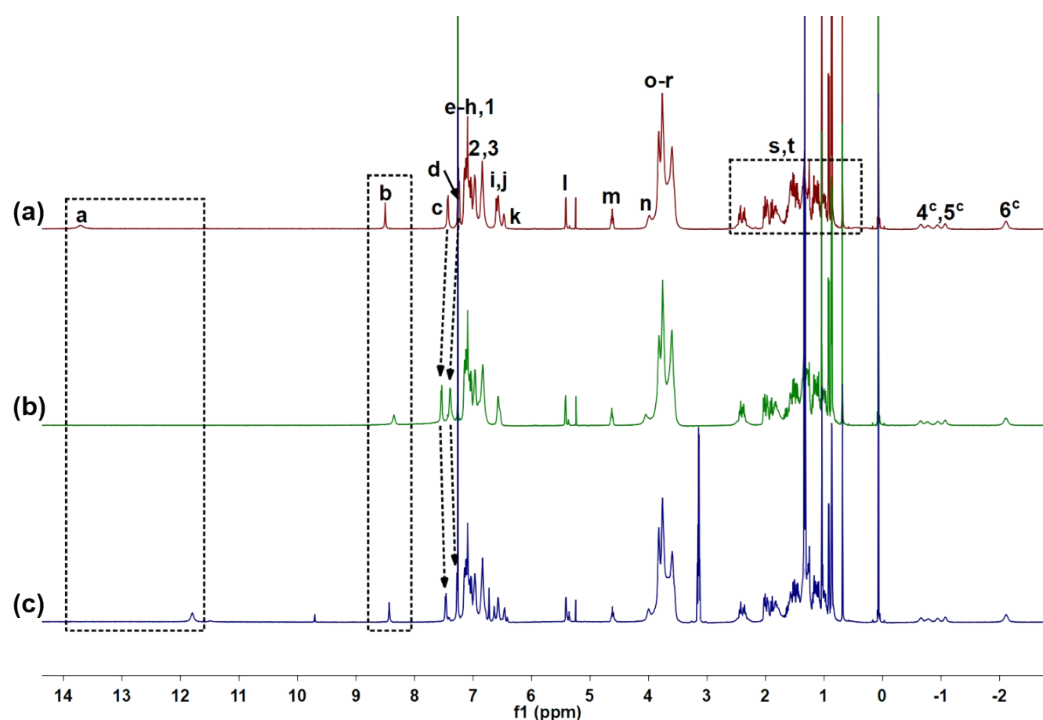

**Figure S7.** Partial  $^1\text{H}$  NMR spectra (600 MHz,  $\text{CDCl}_3$ , room temperature): (a) **P5-Chol** (5.00 mM) and **TPE-CN** (5.00 mM); (b) After addition of 2.0 molar equiv. of TFA to a; (c) After further addition of 4.0 molar equiv. of TEA to b.

## 9. POM images of P5-Chol during the decrease of temperature at the concentration of 10 mM

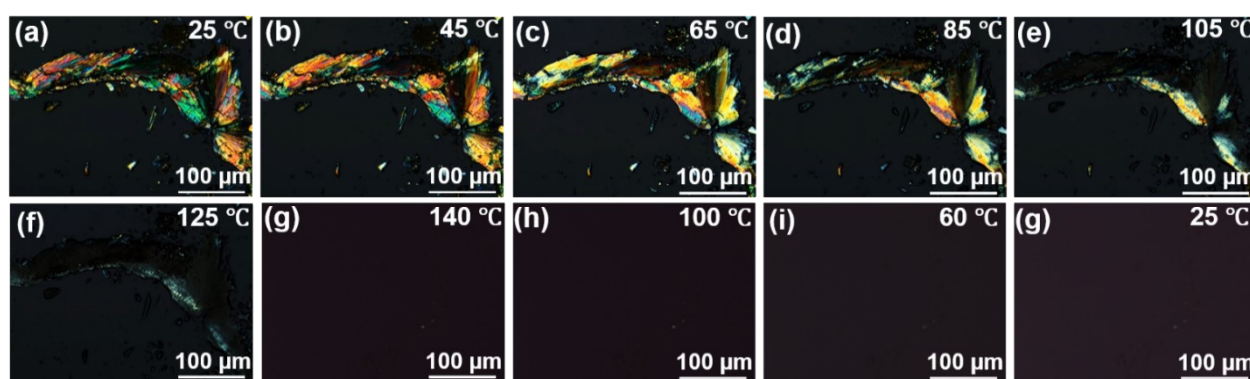

**Fig. S8** Polarized optical micrograph (POM) of **P5-Chol** at different temperatures: (a) 25.0 °C; (b) 45.0 °C; (c) 65.0 °C; (d) 85 °C; (e) 105 °C; (f) 125 °C; (g) 140 °C; (h) when the temperature of **P5-Chol** increased to 140 °C and then decreased to 100 °C; (i) 60 °C; (g) 25 °C.



**10. POM images of P5-Chol during the decrease of temperature at the concentration of 70 mM**

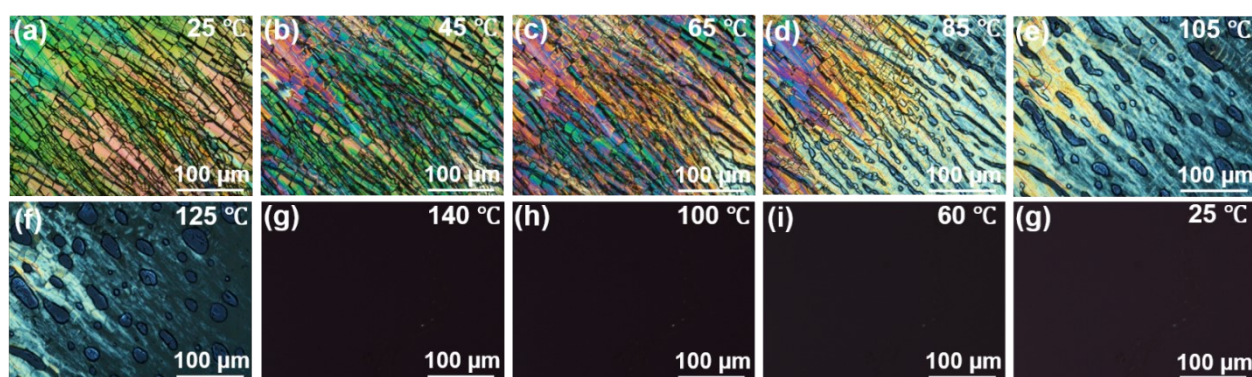

**Fig. S9** Polarized optical micrograph (POM) of **P5-Chol** at different temperatures: (a) 25.0 °C; (b) 45.0 °C; (c) 65.0 °C; (d) 85 °C; (e) 105 °C; (f) 125 °C; (g) 140 °C; (h) when the temperature of **P5-Chol** increased to 140 °C and then decreased to 100 °C ; (i) 60 °C; (g) 25 °C.

**11. POM images of P5-Chol⊃TPE-CN during the decrease of temperature at the concentration of 10 mM**

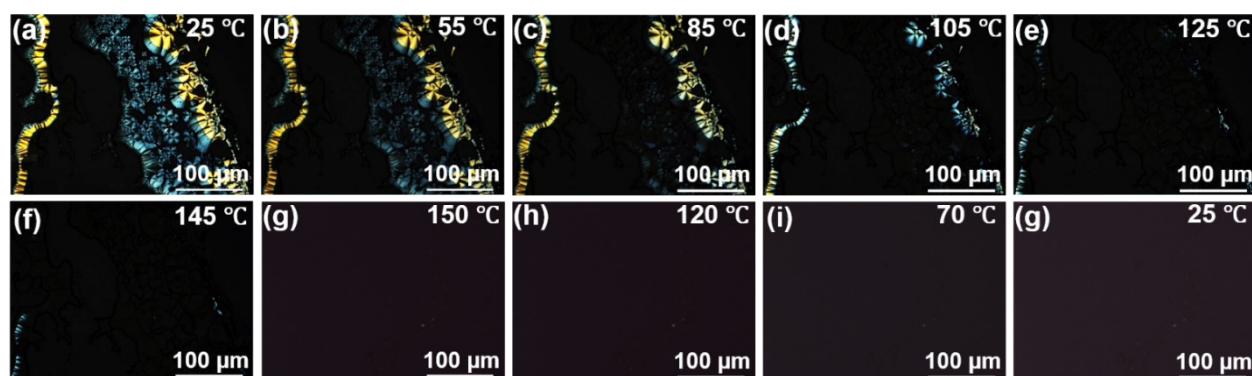

**Fig. S10** Polarized optical micrograph (POM) of **P5-Chol⊃TPE-CN** at different temperatures: (a) 25.0 °C; (b) 55.0 °C; (c) 85.0 °C; (d) 105 °C; (e) 125 °C; (f) 145 °C; (g) 150 °C; (h) when the temperature of **P5-Chol⊃TPE-CN** increased to 150 °C and then decreased to 120 °C ; (i) 70 °C; (g) 25 °C.

**12. POM images of P5-Chol⊃TPE-CN during the decrease of temperature at the concentration of 70 mM**

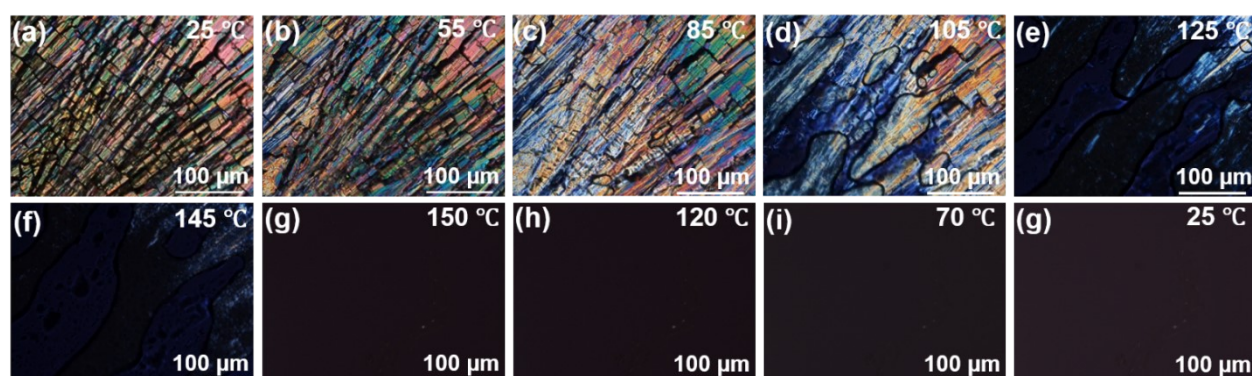

**Fig. S11** Polarized optical micrograph (POM) of **P5-Chol⊃TPE-CN** at different temperatures: (a) 25.0 °C; (b) 55.0 °C; (c) 85.0 °C; (d) 105 °C; (e) 125 °C; (f) 145 °C; (g) 150 °C; (h) when the temperature of **P5-Chol⊃TPE-CN** increased to 150 °C and then decreased to 120 °C ; (i) 70 °C; (g) 25 °C.



### 13. Absorption and emission spectra of P5-Chol and TPE-CN

The photophysical properties of **P5-Chol** and **TPE-CN** were investigated by UV-vis adsorption and fluorescence emission spectroscopy. There is no effective overlap between the absorption spectrum and fluorescence spectrum of **P5-Chol** and **TPE-CN**, indicating no effective fluorescence-resonance energy transfer (FRET) between them.

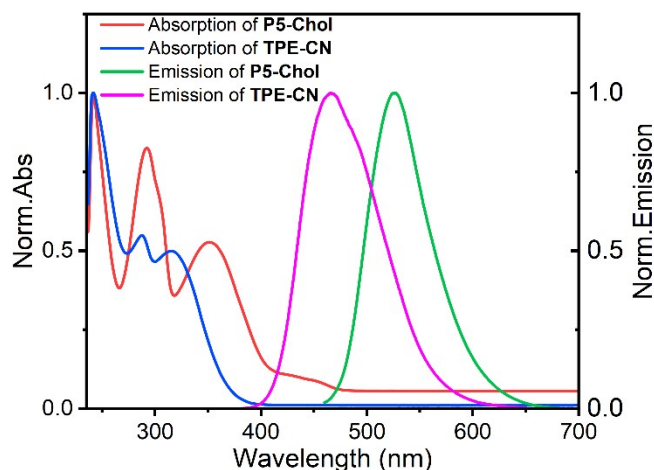

**Fig. S12** Normalized absorption and emission spectra of **P5-Chol** ( $\lambda_{\text{ex}} = 360$  nm) and **TPE-CN** ( $\lambda_{\text{ex}} = 315$  nm) in the solid stated.

### 14. Solid fluorescence emission spectra of P5-Chol $\supset$ TPE-CN

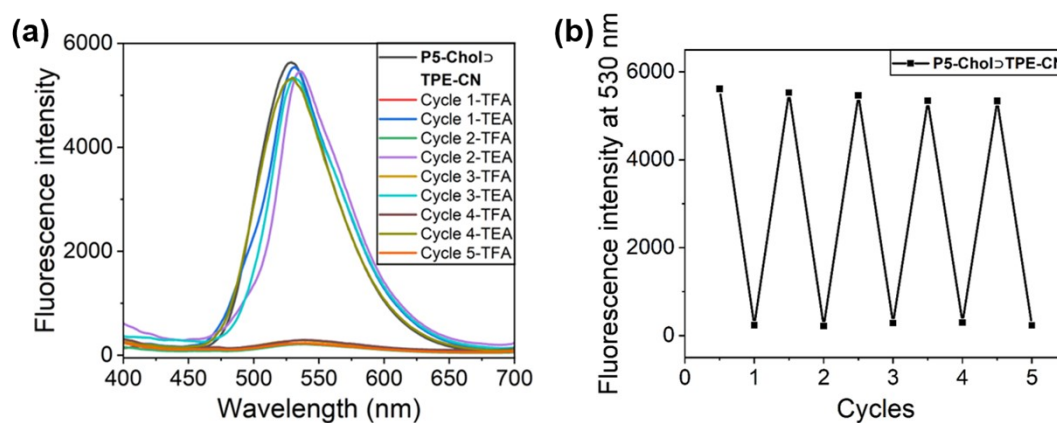

**Fig. S13** (a) The solid fluorescence emission spectra of **P5-Chol $\supset$ TPE-CN** in the solid state during five cycle experiments ( $\lambda_{\text{ex}} = 360$  nm;  $\lambda_{\text{em}} = 530$  nm); (b) The line chart of **P5-Chol $\supset$ TPE-CN** during five cycle experiments.

## References

- S1. B. Liang, D. Xia, Y. Cheng, Q. Zheng and P. Wang, *A supramolecular polymer network constructed using a pillararene-based multi-functional monomer and its application as a rewritable fluorescent paper*, *Dalton Trans.*, 2023, **52**, 17099-17103.
- S2. X. H. Wang, N. Song, W. Hou, C. Y. Wang, Y. Wang, J. Tang and Y. W. Yang, *Efficient Aggregation-Induced Emission Manipulated by Polymer Host Materials*, *Adv. Mater.*, 2019, **31**, 1903962.
